# Supplementary material
Source: PubMed Central journal article supplement (PMC3980800)

## SUPPLEMENTAL TABLES

**Supplemental Table 1. Demographic and background data.** Note: “Age” refers to age at the time of Phase 3 evaluation. “Sex” refers to the percentage of male veterans. “Years of education” refers to the total number of years of education the veterans completed.

| <b>Demographic Data</b>                      | <b>Patient Group</b> |
|----------------------------------------------|----------------------|
| Age                                          | 58.13                |
| Sex (% male)                                 | 100.00               |
| Years of education                           | 15.00                |
| Total percent volume loss (cm <sup>3</sup> ) | 3.19                 |

**Supplemental Table 2.** Description of the administered tests.

| Test                                                             | Description                                                                                                                                                                                |
|------------------------------------------------------------------|--------------------------------------------------------------------------------------------------------------------------------------------------------------------------------------------|
| <b>Emotional intelligence</b>                                    |                                                                                                                                                                                            |
| Perceiving Emotions: Faces                                       | The ability to perceive emotions in oneself and others                                                                                                                                     |
| Perceiving Emotions: Pictures                                    | The ability to perceive emotions in oneself and in objects, art, stories, music, and other stimuli                                                                                         |
| Using Emotions: Sensations                                       | The ability to generate, use, and feel emotion as necessary to communicate feelings                                                                                                        |
| Using Emotions: Facilitation                                     | The ability to generate, use, and feel emotion as necessary to employ them in other cognitive processes                                                                                    |
| Understanding Emotions: Blends                                   | The ability to understand emotional information, to understand how emotions combine and to appreciate such emotional meanings                                                              |
| Understanding Emotions: Changes                                  | The ability to understand emotional information, to understand how emotions progress through relationship transitions, and to appreciate such emotional meanings                           |
| Managing Emotions: Emotion                                       | The ability to be open to feelings, and to modulate them in oneself                                                                                                                        |
| Managing Emotions: Social                                        | The ability to be open to feelings, and to modulate them in oneself and others so as to promote personal understanding and growth                                                          |
| <b>Working memory (WAIS-III)</b>                                 |                                                                                                                                                                                            |
| Arithmetic                                                       | Participant hears numerical problems in story format, performs mental arithmetic, and responds orally                                                                                      |
| Digit Span                                                       | Participant hears a sequence of digits and repeats them initially forwards and then backwards                                                                                              |
| Letter-Number Sequencing                                         | Participant hears a sequence of alternating digits and letters and then rearranges the items, first repeating the digits in numerical order, followed by the letters in alphabetical order |
| <b>Verbal comprehension/Crystallized intelligence (WAIS-III)</b> |                                                                                                                                                                                            |
| Vocabulary                                                       | Participant generates verbal definition for words pronounced by the examiner                                                                                                               |
| Similarities                                                     | Participant indicates how two items, presented orally, are the same                                                                                                                        |
| Information                                                      | Participant verbally answers factual oral questions                                                                                                                                        |
| Comprehension                                                    | Participant verbally answers factual oral questions                                                                                                                                        |
| <b>Perceptual organization/Fluid intelligence (WAIS-III)</b>     |                                                                                                                                                                                            |

|                                    |                                                                                                                                                                      |
|------------------------------------|----------------------------------------------------------------------------------------------------------------------------------------------------------------------|
| Block Design                       | Participant arranges multicolored blocks to match a model design                                                                                                     |
| Matrix Reasoning                   | Participant selects from an array of pictured items the abstract shape that completes the visual-spatial pattern                                                     |
| Picture Completion                 | Participant identifies the missing element in a series of pictures                                                                                                   |
| Picture arrangement                | Participant arranges pictures in a coherent sequence to tell stories                                                                                                 |
| Object assembly                    | Participant rearranges puzzle pieces to form familiar objects                                                                                                        |
| <b>Processing speed (WAIS-III)</b> |                                                                                                                                                                      |
| Digit Symbol Coding                | Participant codes items based on a table that contains digits paired with symbols                                                                                    |
| Symbol Search                      | Participant performs a visual search to identify whether a target item is present among a set of symbols                                                             |
| <b>Personality (NEO-PI-R)</b>      |                                                                                                                                                                      |
| Extraversion                       | Participant completes a personality inventory that is designed to measure the quantity and intensity of energy directed outwards into the social world               |
| Agreeableness                      | Participant completes a personality inventory that is designed to measure the kinds of interactions an individual prefers from compassion to tough mindedness        |
| Conscientiousness                  | Participant completes a personality inventory that is designed to measure the degree of organization, persistence, control, and motivation in goal-directed behavior |
| Neuroticism                        | Participant completes a personality inventory that is designed to identify individuals that are prone to psychological distress                                      |
| Openness to experience             | Participant completes a personality inventory that is designed to measure the active seeking and appreciation of experience for their own sake                       |

## FIGURES

**Supplemental Figure 1.** Confirmatory factor analysis for the intelligence factors ( $n = 152$ ). Regression weights for the specific measures are depicted on the right for clarity.

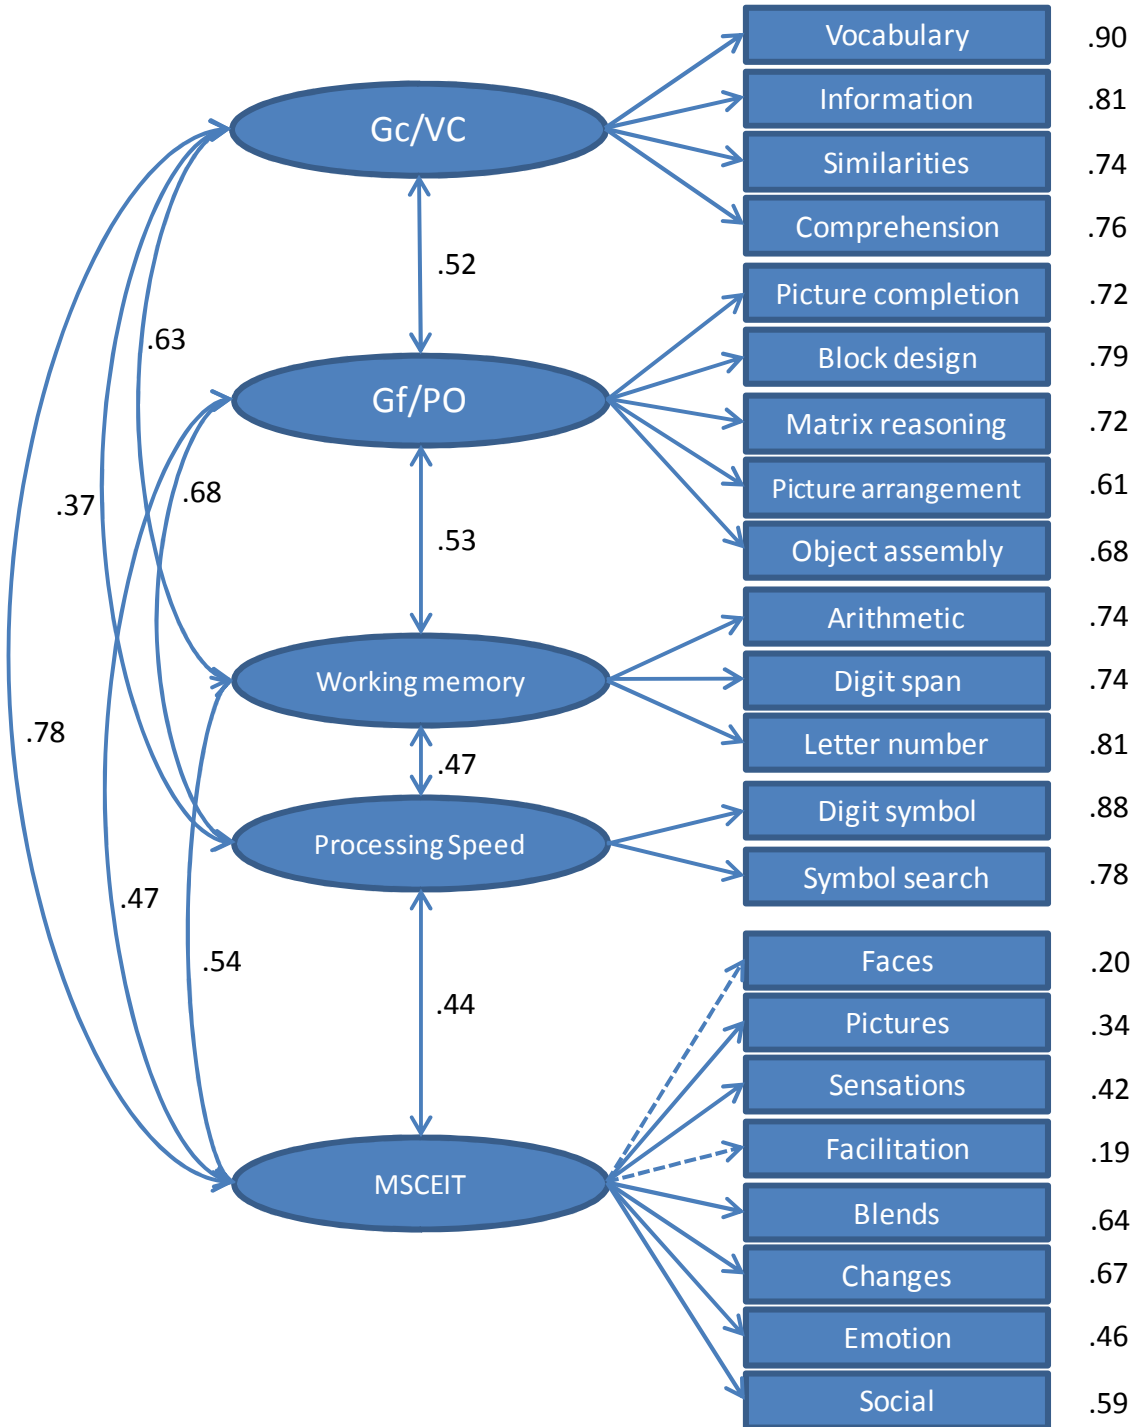

**Supplemental Figure 2.** Lesion overlap map illustrating the number of patients with brain lesions to a particular voxel. In each axial slice, the right hemisphere is on the reader's left. To ensure sufficient statistical power for detecting a lesion-deficit correlation, our analysis only included voxels for which 4 or more patients had a lesion.

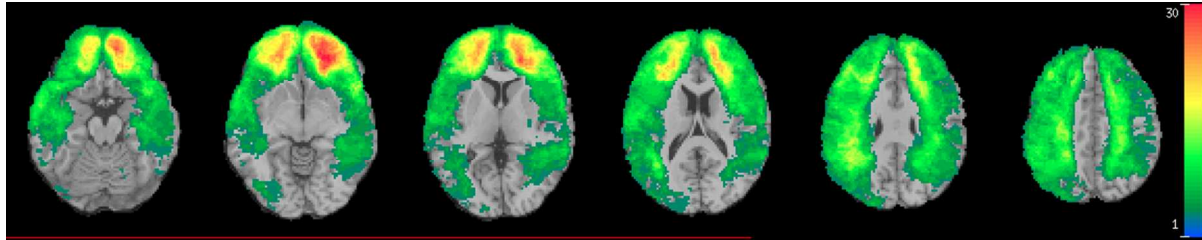

Supplement: supp_nss124_scan-12-085.pdf [file supp_nss124_scan-12-085.pdf]
